# Supplementary material for: An international core outcome set for evaluating interventions to improve informed consent to clinical trials: The ELICIT Study
Source: PubMed Central journal article supplement — J Clin Epidemiol. 2021 Sep;137:14–22. doi: 10.1016/j.jclinepi.2021.02.020 (PMC8485845; doi:10.1016/j.jclinepi.2021.02.020), 2021-09
Supplement: mmc2.pdf [file mmc2.pdf]

| Outcome domain                                                   | Outcome                          | Concepts | Verbatim outcome from literature                                                                                                                                                                                                                                                                                                                                                                                                                                                                                                                                                                                                                                                                                                                                                                                                                                                                                                                                                                                                                                                                                                                                                                                                                                                                                                                                                                                                                                                                                                                                                                                                                                                                                                                                                                                                                                                                                                                                                                                                                                                                                                                                                                                                                 | Additional verbatim outcome from interviews |
|------------------------------------------------------------------|----------------------------------|----------|--------------------------------------------------------------------------------------------------------------------------------------------------------------------------------------------------------------------------------------------------------------------------------------------------------------------------------------------------------------------------------------------------------------------------------------------------------------------------------------------------------------------------------------------------------------------------------------------------------------------------------------------------------------------------------------------------------------------------------------------------------------------------------------------------------------------------------------------------------------------------------------------------------------------------------------------------------------------------------------------------------------------------------------------------------------------------------------------------------------------------------------------------------------------------------------------------------------------------------------------------------------------------------------------------------------------------------------------------------------------------------------------------------------------------------------------------------------------------------------------------------------------------------------------------------------------------------------------------------------------------------------------------------------------------------------------------------------------------------------------------------------------------------------------------------------------------------------------------------------------------------------------------------------------------------------------------------------------------------------------------------------------------------------------------------------------------------------------------------------------------------------------------------------------------------------------------------------------------------------------------|---------------------------------------------|
|                                                                  | Recruitment (n=74)               |          | Recruitment<br>Recruitment<br>Recruitment<br>Recruitment<br>Recruitment rates<br>Recruitment rates<br>Recruitment rate<br>Recruitment rate<br>Recruitment rate (over time)<br>Rate at which participants were recruited<br>Proportion of target population recruited<br>Proportion of eligible individuals or centres recruited<br>Accrual (%)<br>Accrual<br>Actual accrual<br>Actually enrolled<br>Enrolment to the trial<br>Likelihood to enrol<br>Enrolment in trial<br>Enrolment<br>Consent rate<br>Consent rates<br>Proportion of patients consenting<br>Willingness to participate<br>Willingness to participate<br>Willingness to participate<br>Willingness to participate<br>Willingness to participate<br>Willingness to participate<br>Willingness to consent<br>Willingness to join a clinical trial<br>Willingness to enter trial<br>Willingness to participate in clinical trials<br>Participation<br>Participation choice<br>Rates of participation<br>Rate of participation<br>Rate of participation<br>Accepting participation<br>Intended to participate<br>Motivation to participate<br>Motivations to participate<br>Motives for agreeing to participate<br>Motivation<br>Reasons and concerns about participation<br>Reasons for (non-)enrolment<br>Reasons (for giving or not giving consent)<br>Reasons for accepting or declining treatment within a clinical trial<br>reasons for accepting or refusing participation<br>Reasons for participation<br>Reasons for entering the trial<br>Decisions<br>Decision to participate<br>Decision to participate<br>Decision to participate<br>decision whether or not to participate<br>Decision to participate<br>Clinical Trial Decision<br>Decision to participate<br>Proportion undecided<br>Proportion of patients for whom the possibility of participation as discussed<br>Proportion invited to participate in the trial<br>Proportion [of eligible veterans] who agree to participate<br>Agree or refuse to enter<br>Interest in participation<br>Acceptability of recruitment strategy<br>Rates of uptake (or refusal)<br>Randomisation (accept or refuse)<br>Acceptance of allocation<br>informed participation<br>Trial offer<br>Taking part<br>Behaviour<br>Choice |                                             |
| What decisions people make and/or the quality of those decisions | Attrition (n=7)                  |          | Attrition<br>Retention<br>Dropped out<br>Rate of withdrawal<br>Adherence to study protocol<br>Level of adherence to [parent] study protocol<br>Adherence to chosen option                                                                                                                                                                                                                                                                                                                                                                                                                                                                                                                                                                                                                                                                                                                                                                                                                                                                                                                                                                                                                                                                                                                                                                                                                                                                                                                                                                                                                                                                                                                                                                                                                                                                                                                                                                                                                                                                                                                                                                                                                                                                        |                                             |
|                                                                  | Therapeutic misconception (n=11) |          | Therapeutic misconception<br>Therapeutic misconception<br>Therapeutic misconception<br>Therapeutic misconception                                                                                                                                                                                                                                                                                                                                                                                                                                                                                                                                                                                                                                                                                                                                                                                                                                                                                                                                                                                                                                                                                                                                                                                                                                                                                                                                                                                                                                                                                                                                                                                                                                                                                                                                                                                                                                                                                                                                                                                                                                                                                                                                 |                                             |

|  |                                                                                                                                                                             |                                                                                                                                                                                                                                                                                                                                                                                                                                                                                                                                                                                                                                                                                                                                                                                                                                                                                                                                                                                                                                                                                                                                                                                                                                                                                                                                                                                                                                                                                                                                                                                                                                                                                                                                                                                                                                                                                                                                                                                                                                                                                                                                                                                                                                                                                                                                                                                                                                                                                                                                                 |
|--|-----------------------------------------------------------------------------------------------------------------------------------------------------------------------------|-------------------------------------------------------------------------------------------------------------------------------------------------------------------------------------------------------------------------------------------------------------------------------------------------------------------------------------------------------------------------------------------------------------------------------------------------------------------------------------------------------------------------------------------------------------------------------------------------------------------------------------------------------------------------------------------------------------------------------------------------------------------------------------------------------------------------------------------------------------------------------------------------------------------------------------------------------------------------------------------------------------------------------------------------------------------------------------------------------------------------------------------------------------------------------------------------------------------------------------------------------------------------------------------------------------------------------------------------------------------------------------------------------------------------------------------------------------------------------------------------------------------------------------------------------------------------------------------------------------------------------------------------------------------------------------------------------------------------------------------------------------------------------------------------------------------------------------------------------------------------------------------------------------------------------------------------------------------------------------------------------------------------------------------------------------------------------------------------------------------------------------------------------------------------------------------------------------------------------------------------------------------------------------------------------------------------------------------------------------------------------------------------------------------------------------------------------------------------------------------------------------------------------------------------|
|  | <p>Decision conflict (n=10)</p> <p>Decision regret n=9)</p> <p>Quality of decision (n=7)</p> <p>Deliberation (n=2)</p> <p>Values congruence n=15)</p> <p>Anxiety (n=19)</p> | <p>Therapeutic misconception</p> <p>Therapeutic misconception</p> <p>Therapeutic misconception</p> <p>Therapeutic misconception</p> <p>Comprehension of research procedures and therapeutic misconception</p> <p>Individual treatment</p> <p>Personal care vs. generalizable knowledge</p> <p>Decisional conflict</p> <p>Decisional regret</p> <p>Decisional regret</p> <p>Decisional regret</p> <p>Decisional regret</p> <p>Decisional regret</p> <p>Decisional regret</p> <p>Decision regret</p> <p>Regret</p> <p>Anticipated regret of negative outcomes</p> <p>Quality of consent process</p> <p>High quality decision making</p> <p>Decision making process measures</p> <p>Attributes of the decision making process</p> <p>Decision making</p> <p>Difficulties with decision making</p> <p>Valid [decision]</p> <p>Make a deliberate decision</p> <p>Deliberation (weighing up)</p> <p>Values</p> <p>Values associated with outcomes</p> <p>Values of the research participant</p> <p>Value congruence with chosen option</p> <p>Values-based decision</p> <p>Understand that values affect the decision</p> <p>Discuss values with ether practitioner</p> <p>Informed participation that is somehow assessed as being congruent with individuals values and other criteria such as health outcomes</p> <p>Be clear about the option features that matter most</p> <p>Patients' decision making being supported b evidence of knowledge and consistent values (or satisfaction with the decision)</p> <p>The way the patient used the information [i.e. consistent with values]</p> <p>Ability to identify features of options that matter most</p> <p>Participation in a given study is consistent with their interests (research impact)</p> <p>Research impact</p> <p>Convenience or inconvenience that participating in the study would mean for you</p> <p>Anxiety</p> <p>Patient state anxiety</p> <p>Consent anxiety</p> <p>depression</p> <p>emotional distress</p> <p>emotions</p> |
|  | <p>Satisfaction (n=35)</p>                                                                                                                                                  | <p>Satisfaction</p> <p>Patient satisfaction</p> <p>Patient satisfaction and perception</p> <p>Satisfaction with decision making</p> <p>Satisfaction with decision making</p> <p>satisfaction with decision making process</p> <p>Satisfaction with the decision (to participate or not)</p> <p>Satisfaction and anxiety with decision making</p>                                                                                                                                                                                                                                                                                                                                                                                                                                                                                                                                                                                                                                                                                                                                                                                                                                                                                                                                                                                                                                                                                                                                                                                                                                                                                                                                                                                                                                                                                                                                                                                                                                                                                                                                                                                                                                                                                    |

|                                                |                                                                               |                                                                                                                                                                                                                                                                                                                                                                                                                                                                                                                                                                                                                                                                                                                                                                                                                                                                                                                          |                                                                                   |
|------------------------------------------------|-------------------------------------------------------------------------------|--------------------------------------------------------------------------------------------------------------------------------------------------------------------------------------------------------------------------------------------------------------------------------------------------------------------------------------------------------------------------------------------------------------------------------------------------------------------------------------------------------------------------------------------------------------------------------------------------------------------------------------------------------------------------------------------------------------------------------------------------------------------------------------------------------------------------------------------------------------------------------------------------------------------------|-----------------------------------------------------------------------------------|
| Experiences of decision-making in this context |                                                                               | Satisfaction with decision to participate or decline<br>Decisional satisfaction<br>Satisfaction with quality and quantity of information<br>Satisfaction with ease and reading of consent statement<br>Satisfaction with the information provided<br>Satisfaction with the media used<br>satisfaction with media used to convey the information<br>Satisfaction with the discussion<br>Satisfaction with the consent process<br>Satisfaction with the consent consultation<br>Satisfaction and anxiety with the consent process<br>satisfaction with the study<br>satisfaction with the information provide about the parent study<br>Satisfaction and usefulness of intervention<br>Satisfaction (with intervention)<br>Satisfaction with doctor-patient interaction<br>Satisfaction with communication with health professional<br>Satisfaction with the doctors consultation styles and information on trial concepts |                                                                                   |
|                                                | Confidence (n=5)                                                              | Confidence<br>Confidence in patient's decision and whether an informed choice was made<br>Confidence in the ability to participate<br>Confidence in doctors<br>Confidence in the messenger [recruiter]                                                                                                                                                                                                                                                                                                                                                                                                                                                                                                                                                                                                                                                                                                                   |                                                                                   |
|                                                | Experience (n=5)                                                              | Experience<br>Experience<br>Experience of the clinical trial<br>Experiences and feelings over being included<br>Subjective experience of the process                                                                                                                                                                                                                                                                                                                                                                                                                                                                                                                                                                                                                                                                                                                                                                     |                                                                                   |
|                                                | Burden (n=3)                                                                  |                                                                                                                                                                                                                                                                                                                                                                                                                                                                                                                                                                                                                                                                                                                                                                                                                                                                                                                          | Burden of the consent process<br>Burden of informed consent<br>Emotional burden   |
|                                                | Time to decide (n=17)                                                         | Time<br>Time<br>Time factor<br>Time spent reading the information<br>Time taken to administer<br>Time taken to administer the consent process<br>Time to make the decision<br>Length of time<br>Length of time taken<br>Length of time of the informed consent process<br>Length of consultation<br>Length of consultations<br>Consultation length<br>Consultation length<br>Duration<br>Weren't rushed<br>Delay in decision making or request for more information/further consultations                                                                                                                                                                                                                                                                                                                                                                                                                                |                                                                                   |
|                                                | Feeling valued (n=1)<br>Respect for decision making (n=2)                     | Respect<br>Rights were respected<br>Less comfortable<br>Coercion<br>Feeling of coercion<br>Threats<br>Manipulation or deception                                                                                                                                                                                                                                                                                                                                                                                                                                                                                                                                                                                                                                                                                                                                                                                          | Making a valued contribution                                                      |
|                                                | Comfortable (n=1)<br>Coercion (n=4)                                           |                                                                                                                                                                                                                                                                                                                                                                                                                                                                                                                                                                                                                                                                                                                                                                                                                                                                                                                          |                                                                                   |
|                                                | Helpful (n=1)<br>Authenticity (n=1)<br>Communication (n=7)                    | Communication of decision<br>Communication with trial recruiters<br>Patient-clinician communication<br>Patient-practitioner communication<br>Patient-recruiter communication<br>The number of issues about trials discussed<br>The overall complexity of the trial discussion                                                                                                                                                                                                                                                                                                                                                                                                                                                                                                                                                                                                                                            | Whether the patient felt like it was helpful<br>Authenticity of someone's consent |
|                                                | Empowerment (n=2)                                                             |                                                                                                                                                                                                                                                                                                                                                                                                                                                                                                                                                                                                                                                                                                                                                                                                                                                                                                                          | Empowers the person in making their decision<br>Empowered choice                  |
|                                                | Likelihood to engage with future research (n=1)<br>Protection of rights (n=8) | Consider participating in future trials<br>Protection of human rights<br>Rights of participants<br>How well they felt their human rights were protected<br>Patient decision making rights<br>Right to decide<br>Beneficence<br>Non-maleficence<br>Justice                                                                                                                                                                                                                                                                                                                                                                                                                                                                                                                                                                                                                                                                |                                                                                   |
|                                                | Autonomy (n=11)                                                               | Autonomy<br>Autonomy<br>Autonomy<br>Autonomy<br>Autonomy<br>Autonomy of the participant<br>Personal autonomy<br>Competency<br>Competency<br>Decision-making capacity                                                                                                                                                                                                                                                                                                                                                                                                                                                                                                                                                                                                                                                                                                                                                     |                                                                                   |



can stop at any time  
informed who to call  
allowed to discuss with others  
treated as an adult  
informed rights as a person  
informed could talk to anyone  
confidentiality  
Aim  
scientific background  
background  
purpose of the study  
purpose of trial  
trial objective  
concept of clinical trial (in general)  
specific purpose  
research study goals  
research value of treatment  
concepts related to the research design and conduct of the parent study (for example the concept of randomisation and how data will be collected)  
purpose  
eligibility requirements  
design  
study design  
randomisation  
randomisation  
random assignment  
meaning of random assignment  
concept of randomisation  
Proposed treatment  
treatment procedures  
treatment objective  
effectiveness of intervention  
knowledge of trial medication  
familiarity with the procedures and medication  
mechanism of action of study drug  
concepts related to the condition of intervention involve in the parent study (for example, potential benefits or harms of the intervention)  
available alternative treatments  
alternative treatments  
alternative treatments  
know the options and their features  
placebo  
treatment risk  
risks/side effects  
side effects  
side effects  
side effects  
side effects  
benefits and risks  
knowledge of probabilities of outcomes  
perceived personal benefits  
perceived negative aspects  
duration of the study  
Study endpoints  
clinic visits schedule  
extra tests  
procedures  
risk of outcome measure assessment  
formalities  
finance  
informed how expenses handled  
Altruism  
Disclosure  
Disclosure  
Information disclosure  
Full information disclosure  
Preference for information  
Preferences for information  
Information preference  
Preferred verbal (Word) or numerical descriptors or both [for potential benefits and risks]  
Adequacy  
Adequacy of information  
Adequacy of information  
Adequacy of the information to enable:  
Usefulness of trial information  
How useful was the information  
Importance of information  
Information transmitted  
Sufficiency of information  
Amount of information  
Amount of information  
Length of information  
Level of detail  
Subjective evaluation of the given information  
Desire for further information  
How much of the information they read  
Type of information  
Information you were given about the trial by the surgeon in clinic

Disclosure



Understanding  
Understand/Understanding  
Understand  
Understand  
Understand  
Understand  
Understand  
Understanding (or knowledge)  
Understanding/knowledge  
Knowledge and understanding  
Participants Understanding  
Perception f understanding  
Perceived Understanding  
perceived (subjective) understanding  
Perceived/subjective understanding  
Subjective understanding  
Subjective understanding  
Subjective understanding  
Objective understandings  
Objective understandings  
Overall understanding  
Overall understanding  
Actual (objective) understanding  
Actual understanding  
Actual and perceived understanding  
Understanding of clinical trials  
Understanding of (hypothetical) trial  
Understanding of clinical trial  
Understanding of trial concepts  
Understanding of the trial  
Understanding of key concepts in clinical trials  
Understanding of trial design  
Understanding of the aim  
Understanding (trial purpose)  
Patient Perception of Being Informed (PPBI)- assess understanding of:  
Sign a form  
Meaning  
*the intersubjective understanding which exists between the sender and the receiver*  
*the understanding of the graphic symbols*  
*the cognitive understanding of the subject matter*  
*the understanding of the message itself*  
*Participants awareness of enrolment in a clinical trial*  
*policies*  
*future studies*  
*Diagnosis*  
*Prognosis*  
*injury*  
*The main reason AIDS clinical trials are done is so to improve the treatment of future HIV-positive or AIDS patients*  
*Because I am participating in a clinical trial, it is possible that the study sponsors, government agencies, or others who are directly involved in my care could review my medical tissue analysis*  
*human rights protections (i.e. confidentiality)*  
*meaning of trial terms*  
*When I signed the consent form for my current cancer therapy, I knew that I was agreeing to participate in a clinical trial.*  
*All the treatments and procedures in my clinical trial are standard for my type of cancer.*  
*In my clinical trial, one of the researchers' major purposes is to compare the effects (good and bad) of two or more different ways of treating patients with my type of cancer, in*  
*In my clinical trial, one of the researchers' major purposes is to find the highest dose of a new drug or treatment that can be given without causing severe side effects.*  
*In my clinical trial, one of the researchers' major purposes is to find out what effects (good and bad) a new treatment has on me and my cancer.*  
*The treatment being researched in my clinical trial has been proven to be the best treatment for my type of cancer.*  
*In my clinical trial, each group of patients receives a higher dose of the treatment than the group before, until some patients have serious side effects.*  
*There may not be direct medical benefit to me from my participation in this clinical trial.*  
*Because I am participating in a clinical trial, it is possible that the study sponsor, various government agencies, or others who are not directly involved in my care could review*  
*What the researchers are trying to find out in the clinical trial*  
*Which of these treatments and procedures are experimental*  
*Overall, how well did you understand your clinical trial when you signed the consent form?*  
*What is a clinical trial as opposed to standard care?*  
*what are the types of clinical trials (phase I, II, III)*  
*why do we do so many tests on clinical trials, like scans, and questionnaires and so forth?*  
*why is it necessary to do clinical trials? Why cant we just use things that should work?*  
*how are patients protected in clinical trials?*  
*how, basically, do statistics work?*  
*who do we do blood testing and tissue testing?*

How people make decisions

what is pharmacokinetics?  
who makes money if I join a clinical trials?  
uncertainty regarding treatment outcomes  
given the name of the illness  
explained everything required  
explained time required  
Understood terms  
information confusing  
informed may be helped  
the study involves research  
participate in research (research contribution)  
effectiveness/efficacy  
participating in research  
that investigators, unlike clinicians, will be relying on the participants efforts to gather information that might help others  
asking the patient directly if the information had been understood  
relation ship they will have with the investigator (research relationship)  
the process and meaning of consent  
consent forms  
the process and meaning of consent  
consent form  
process and meaning of consent  
The consent form I signed tells me what will happen when I participate in my clinical trial  
When I signed the consent form for my currency HIV/AIDS treatment, I knew I that was agreeing to participate in a clinical trial.  
Consent information  
The consent form  
why do patients have to sign a consent form?  
Purpose of study  
the nature of the trial  
trial procedures  
the nature of the trial  
Purpose of the study  
trial procedures  
study procedures  
research goal  
Nature and purpose of the trial  
purpose and procedures  
study purpose  
in my clinical trial, one of the researchers' major purposes is to compare the effects (good and bad) of two or more different ways of treating patients with HIV/AIDS, in order to  
understanding of the aims of the study  
purpose  
make sense of trial  
the diagnostic procedures and tests at baseline  
purpose  
study purpose  
procedures  
procedures  
The treatments and procedures you will undergo  
specific study procedures  
trial procedures  
trial procedures  
trial procedures  
trial procedures  
ideal method of treatment  
Treatment involves research  
experimental aspects  
The treatment being researched in my clinical trial has been proven to be the best treatment  
individualisation  
research value of treatment  
The fact that your treatment involves research  
randomisation  
what randomisation means  
randomisation  
random selection of the treatment arm  
randomisation  
randomisation  
randomisation  
randomisation  
randomisation  
randomisation  
randomisation  
concept of randomisation  
Treatment randomisation  
randomisation  
why do we use randomisation?  
After I agreed to participate in my clinical trial, my treatment was chosen randomly (by chance) from two or more possibilities.  
Treatment allocation i.e. receive drug or placebo  
allocation to treatment  
After I agreed to participate in my clinical trial, my treatments chosen randomly (by chance) from two or more possibilities  
treatment allocation  
Placebos  
the use of two different treatments  
treatment assignment  
blinding  
In my clinical trial, both my provider and I know which treatment I am receiving  
Placebo controlled



in my clinical trial, I have a chance of getting a placebo in combination with treatment. A placebo is a pill that does not contain any medicine or drug

placebo

why do we use placebo

Voluntariness

voluntary participation

of voluntary choice to participate

voluntariness

voluntariness

the fact that participation in the clinical trial is voluntary

participation is voluntary

voluntariness

voluntary nature of participation

Voluntarism

If I had not wanted to participate in the clinical trial, I could have declined to sign the consent form

voluntariness

participation is voluntary

did not feel forced to enrol

If I had not wanted to participate in this clinical trial, I could have declined to sign the consent form.

The fact that participation in the clinical trial is voluntary

Right to withdraw

right to withdraw

right to withdraw

withdrawal

awareness of the possibility of withdrawing from participation at any time

I will have to remain in the clinical trial even if I decide someday that I want to withdraw

withdrawal

conditions of withdrawal of consent

I will have to remain in the clinical trial even if I decide someday that I want to withdraw.

Side effects

I was given a list of possible side effects relating to the drugs studied in my clinical trial

major associated risks

side-effects

possible risks

risks

risks and benefits

risks and benefits

benefits and risks

risks and benefits

risk through participation

benefit for future patients

dis/advantages of participating

Possible risks and discomforts of participating in the trial

any direct benefits to you of participating in the clinical trial

whether your participation in this clinical trial may benefit future patients

the clarity of the explanation of risks and benefits of study participation

risks of participation

benefits of participation

Compared with standard treatment, my clinical trial does not carry any additional risks or discomforts

If the treatment to which I have been assigned in my clinical trial gives me side effects, the provider can change it to another treatment

risk

risk

benefit

benefit

benefit

consequences

risks of the study drugs on contraception and exclusion of pregnant women

risks

potential benefits

Risks and benefits

relevant risks explained

informed possible will suffer

benefits were listed

risks

potential benefits

likelihood of certain events occurring

Compared with standard treatments for my type of cancer, my clinical trial does not carry any additional risks or discomforts.

The possible risks and discomforts of participating in the clinical trial

The possible benefits to you of participating in the clinical trial

Study duration

Amount of time you will be in the clinical trial

I have been informed how long my participation in this clinical trial will last

I have been informed how long my participation in this clinical trial is likely to last.

How long you will be in the clinical trial

equipose

equipose

care outside the trial

Confidentiality of personal info

privacy and confidentiality

that your data from the clinical trial is kept confidential

measures used to protect confidentiality

confidentiality

confidentiality



*study-background (why is the study being conducted, by whom, which are the involved centres, why are you being asked to participate, how will be the study conducted)*  
*Elements of treatment and diagnosis*  
*trial purpose and nature*  
*Purpose of research*  
*study purpose*  
*purpose of the study*  
*receive best possible treatment*  
*what is a clinical trial?*  
*is the treatment given as a trial?*  
*what is the purpose of the trial?*  
*eligibility i.e. pregnancy*  
*contraindications i.e. pill*  
*Purpose of consent form*  
*Elements of informed consent*  
*study procedures*  
*study procedure*  
*treatment protocol*  
*rights (to withdraw from the study, refuse to participate, to compensation in case of injury, confidentiality)*  
*Elements of patient rights*  
*voluntariness*  
*Autonomy/decision making*  
*choice*  
*were you explained that you will still receive treatment if you decline the trial?*  
*were you explained that your participation is voluntary?*  
*right of refusal*  
*right of withdrawal*  
*withdrawal*  
*withdrawing from the study*  
*Freedom to withdraw*  
*were you explained you can withdraw?*  
*confidentiality*  
*Confidentiality*  
*confidentiality*  
*Privacy*  
*compensation*  
*financial*  
*design (how many groups, what determines which patient will go to which group, who will know which treatment you are getting, how the drugs are to be taken, follow-up visits)*  
*randomisation*  
*randomisation*  
*randomisation and placebo trial design*  
*Randomisation (accept or refuse)*  
*how is the treatment assigned?*  
*why is the assign method used?*  
*blinding*  
*meaning of double-blind*  
*placebo*  
*Interventions*  
*Action of drug A*  
*Action of drug B*  
*side effects*  
*side effects*  
*side effects/risks*  
*risks*  
*risks*  
*risks/side effects*  
*risks and benefits*  
*benefits and risks*  
*benefits*  
*benefit to others*  
*personal benefit*  
*Repeated study procedures*  
*Duration of trial*  
*miscellaneous (approval for the conduct of the study, sponsors, centres involved in the study, whom to contact in case of queries/emergency, treatment subsequent to study period)*  
*reasons to be taken off study*  
*what re alternatives to treatment?*

Perceptions  
*\*Italics denotes*  
*Items depicting*  
*perceptions about*

Perceptions of clinical trials  
 Perceived risk of clinical trial participation  
 Perceptions of the consent process  
 Participants perceptions of the process of seeking informed consent  
 Perceptions regarding their understanding of the study  
 Perceptions of the [intervention]  
 Perceived side effects  
 Perception of risk  
 Accurate risk perceptions  
 Accurate risk perceptions  
 Percieve/perception

|                                                             |                                                                   |                                                                                                                                                                                                                                                                                                                                                                                                                                                                                                                                                                                                                                                                                                                                                                                                                                                                                                                                                                                                                                                                                                                                                                                                                                                                                                                                                                                                                                                                                                                                                                                                                                                                                                                                                                                                                                                                            |                                                                     |
|-------------------------------------------------------------|-------------------------------------------------------------------|----------------------------------------------------------------------------------------------------------------------------------------------------------------------------------------------------------------------------------------------------------------------------------------------------------------------------------------------------------------------------------------------------------------------------------------------------------------------------------------------------------------------------------------------------------------------------------------------------------------------------------------------------------------------------------------------------------------------------------------------------------------------------------------------------------------------------------------------------------------------------------------------------------------------------------------------------------------------------------------------------------------------------------------------------------------------------------------------------------------------------------------------------------------------------------------------------------------------------------------------------------------------------------------------------------------------------------------------------------------------------------------------------------------------------------------------------------------------------------------------------------------------------------------------------------------------------------------------------------------------------------------------------------------------------------------------------------------------------------------------------------------------------------------------------------------------------------------------------------------------------|---------------------------------------------------------------------|
|                                                             |                                                                   | <ul style="list-style-type: none"> <li>value of the intervention</li> <li>physicians language</li> <li>structure of consultation</li> <li>complexity of conversation</li> <li>saturation</li> <li>dialogue atmosphere</li> <li>trial related uncertainty</li> </ul>                                                                                                                                                                                                                                                                                                                                                                                                                                                                                                                                                                                                                                                                                                                                                                                                                                                                                                                                                                                                                                                                                                                                                                                                                                                                                                                                                                                                                                                                                                                                                                                                        |                                                                     |
|                                                             | Beliefs                                                           | <ul style="list-style-type: none"> <li>Belief about risk of participating in research</li> <li>Clinical trial beliefs</li> <li>Positive beliefs</li> <li>Emotions and thoughts</li> <li>Hopes</li> <li>Trust</li> <li>Trust</li> <li>Trust</li> <li>Trust</li> <li>Trust</li> <li>Trust</li> <li>Trust</li> <li>Personal doctor-patient relationship</li> <li>Personal relations</li> <li>Relation to physician</li> <li>Research relationship</li> <li>Relationships with trial recruiters</li> <li>Inter-relational communication</li> <li>Presence of friends or family members</li> <li>Interactions</li> <li>Attitudes</li> <li>Attitudes to trials</li> <li>Attitudes towards the trial</li> <li>Attitudes towards RCTs</li> <li>Attitudes about participation</li> <li>Attitudes towards participating</li> <li>Attitude toward participating in the trial [positive or negative]</li> <li>Attitudes about clinical trial entry</li> <li>Attitudes to trial barriers</li> <li>Attitude towards informed consent process</li> <li>Attitudes towards consent procedure</li> <li>form preferred</li> <li>discouraged research participation</li> <li>participation in fictive RCTs</li> <li>enrolment of children in clinical research</li> <li>role of physicians</li> <li>clinical research in general</li> <li>Expectations</li> <li>Expectations</li> <li>Expectations of the trial</li> <li>Expectations for the trial</li> <li>Expectations towards the trial</li> <li>Expectations regarding personal adherence</li> <li>What I expected to occur</li> <li>Previous research involvement</li> <li>Decision needs to be made</li> <li>Recognition that a decision needs to be made</li> <li>Expression of choice</li> <li>Make an informed choice</li> <li>Meaningful choice</li> <li>Attributes of the choice</li> <li>Evaluation of informed choice</li> </ul> |                                                                     |
|                                                             | Trust (n=7)                                                       |                                                                                                                                                                                                                                                                                                                                                                                                                                                                                                                                                                                                                                                                                                                                                                                                                                                                                                                                                                                                                                                                                                                                                                                                                                                                                                                                                                                                                                                                                                                                                                                                                                                                                                                                                                                                                                                                            |                                                                     |
|                                                             | Relational affects (n=8)                                          |                                                                                                                                                                                                                                                                                                                                                                                                                                                                                                                                                                                                                                                                                                                                                                                                                                                                                                                                                                                                                                                                                                                                                                                                                                                                                                                                                                                                                                                                                                                                                                                                                                                                                                                                                                                                                                                                            |                                                                     |
|                                                             | Attitude (n=17)<br><i>denotes items depicting attitudes about</i> | <i>*italics</i>                                                                                                                                                                                                                                                                                                                                                                                                                                                                                                                                                                                                                                                                                                                                                                                                                                                                                                                                                                                                                                                                                                                                                                                                                                                                                                                                                                                                                                                                                                                                                                                                                                                                                                                                                                                                                                                            |                                                                     |
|                                                             | Expectations (n=8)                                                |                                                                                                                                                                                                                                                                                                                                                                                                                                                                                                                                                                                                                                                                                                                                                                                                                                                                                                                                                                                                                                                                                                                                                                                                                                                                                                                                                                                                                                                                                                                                                                                                                                                                                                                                                                                                                                                                            |                                                                     |
|                                                             | Choice awareness (n=7)                                            |                                                                                                                                                                                                                                                                                                                                                                                                                                                                                                                                                                                                                                                                                                                                                                                                                                                                                                                                                                                                                                                                                                                                                                                                                                                                                                                                                                                                                                                                                                                                                                                                                                                                                                                                                                                                                                                                            |                                                                     |
|                                                             | Choice to engage with research team (n=1)                         |                                                                                                                                                                                                                                                                                                                                                                                                                                                                                                                                                                                                                                                                                                                                                                                                                                                                                                                                                                                                                                                                                                                                                                                                                                                                                                                                                                                                                                                                                                                                                                                                                                                                                                                                                                                                                                                                            | Choice about whether they're going to engage with the research team |
| <b>Personal characteristics that influence the decision</b> | Health literacy (n=1)                                             | Health literacy                                                                                                                                                                                                                                                                                                                                                                                                                                                                                                                                                                                                                                                                                                                                                                                                                                                                                                                                                                                                                                                                                                                                                                                                                                                                                                                                                                                                                                                                                                                                                                                                                                                                                                                                                                                                                                                            |                                                                     |
|                                                             | Reading recognition (n=2)                                         | Reading recognition                                                                                                                                                                                                                                                                                                                                                                                                                                                                                                                                                                                                                                                                                                                                                                                                                                                                                                                                                                                                                                                                                                                                                                                                                                                                                                                                                                                                                                                                                                                                                                                                                                                                                                                                                                                                                                                        |                                                                     |
|                                                             | Agency (n=1)                                                      | Easy to read                                                                                                                                                                                                                                                                                                                                                                                                                                                                                                                                                                                                                                                                                                                                                                                                                                                                                                                                                                                                                                                                                                                                                                                                                                                                                                                                                                                                                                                                                                                                                                                                                                                                                                                                                                                                                                                               | Agency                                                              |
| <b>Assessment level - *Subsequently excluded outcomes</b>   | Clinician outcomes (n=6)                                          | <ul style="list-style-type: none"> <li>Clinician outcomes</li> <li>clinician researcher satisfaction with the informed consent process</li> <li>ease of use of intervention to improve gaining of informed consent</li> <li>clinical researcher ease of use of informed consent process</li> <li>research unit staff and environment</li> <li>research investigators team</li> <li>Healthcare system outcomes</li> <li>System outcomes</li> <li>Legal protection for doctors and hospitals</li> <li>complaints and litigation</li> <li>litigation rates</li> <li>economic/resource use</li> <li>cost-effectiveness</li> <li>cost-effectiveness</li> <li>costs</li> <li>cost of intervention</li> </ul>                                                                                                                                                                                                                                                                                                                                                                                                                                                                                                                                                                                                                                                                                                                                                                                                                                                                                                                                                                                                                                                                                                                                                                     |                                                                     |
|                                                             | Healthcare system outcomes (n=10)                                 |                                                                                                                                                                                                                                                                                                                                                                                                                                                                                                                                                                                                                                                                                                                                                                                                                                                                                                                                                                                                                                                                                                                                                                                                                                                                                                                                                                                                                                                                                                                                                                                                                                                                                                                                                                                                                                                                            |                                                                     |
